# Supplementary material
Source: PubMed Central journal article supplement (PMC8626096)
Supplement: NIHMS1755726-supplement-SI.pdf [file NIHMS1755726-supplement-SI.pdf]

# Supporting Information

## **Solution Structure of Ternary Complex of Berberine Bound to a dGMP-Fill-in Vacancy G-Quadruplex Formed in the PDGFR- $\beta$ Promoter**

Kai-Bo Wang, Jonathan Dickerhoff, and Danzhou Yang

**Table S1.** Proton chemical shifts of berberine-dGMP-Pu19m2 ternary complex at 25 °C in pH 7, 50 mM K<sup>+</sup>-containing solution.

| <b>Base</b> | <b>H1/H2/H5</b> | <b>H6/H8</b> | <b>H1'</b> | <b>H2', H2''</b> | <b>H3'</b> | <b>H4'</b> | <b>H5', H5''*</b> |
|-------------|-----------------|--------------|------------|------------------|------------|------------|-------------------|
| <b>dGMP</b> | 11.36           | 7.97         | 6.09       | 2.49, 2.80       | 4.70       | 4.21       | 3.95, 4.00        |
| <b>A1</b>   | 7.44            | 7.68         | 5.86       | 2.24, 2.34       | 4.63       | 3.91       | 3.30, 3.42        |
| <b>A2</b>   | 7.86            | 8.18         | 6.20       | 2.61, 2.71       | 4.92       | 4.04       | 3.91, 3.72        |
| <b>G3</b>   | 11.59           | 8.13         | 6.10       | 2.79, 3.05       | 5.00       | 4.50       | 4.13, 4.21        |
| <b>G4</b>   | 11.16           | 7.65         | 6.14       | 2.61, 2.99       | 5.02       | 4.56       | 4.31, 4.32        |
| <b>G5</b>   | 10.8            | 7.75         | 6.40       | 2.79, 2.69       | 5.18       | 4.66       | 4.39, 4.32        |
| <b>A6</b>   | 8.33            | 8.57         | 6.69       | 2.94, 2.94       | 5.24       | 4.68       | 4.32, 4.32        |
| <b>G7</b>   | 11.21           | 8.00         | 6.11       | 2.39, 2.91       | 5.18       | 4.51       | 4.31, 4.39        |
| <b>G8</b>   | 11.21           | 7.88         | 6.06       | 2.66, 2.79       | 5.09       | 4.55       | 4.22, 4.30        |
| <b>G9</b>   | 11.03           | 7.64         | 6.35       | 2.68, 2.68       | 5.08       | 4.62       | 4.32, 4.31        |
| <b>C10</b>  | 6.20            | 8.05         | 6.49       | 2.42, 2.77       | 4.99       | 4.58       | 4.32, 4.41        |
| <b>G11</b>  | 11.05           | 7.53         | 6.19       | 2.85, 2.94       | 4.87       | 4.57       | 4.31, 4.41        |
| <b>G12</b>  | 10.84           | 7.94         | 6.47       | 2.77, 2.70       | 5.13       | 4.69       | 4.29, 4.35        |
| <b>C13</b>  | 6.20            | 8.04         | 6.52       | 2.42, 2.77       | 5.11       | 4.62       | 4.31, 4.41        |
| <b>G14</b>  | 11.28           | 7.90         | 6.03       | 2.33, 2.85       | 5.16       | 4.50       | 4.29, 4.37        |
| <b>G15</b>  | 11.3            | 7.89         | 5.98       | 2.68, 2.68       | 5.11       | 4.53       | 4.29, 4.21        |
| <b>G16</b>  | 10.83           | 7.50         | 6.15       | 2.35, 2.54       | 5.04       | 4.52       | 4.30, 4.21        |
| <b>A17</b>  | 7.80            | 8.33         | 6.17       | 2.75, 2.63       | 4.99       | 4.43       | 4.21, 4.21        |
| <b>C18</b>  | 5.67            | 7.44         | 5.84       | 1.72, 2.11       | 4.59       | 3.99       | 3.99, 3.95        |
| <b>A19</b>  | 7.75            | 8.00         | 5.98       | 2.41, 2.26       | 4.45       | 3.92       | 3.82, 3.76        |

Note: \*Assignments are not stereospecific

**Table S2.** Proton chemical shifts of free-dGMP (dGMPb) and bound-dGMP (dGMPa) at 25 °C in pH 7, 50 mM K<sup>+</sup>-containing solution.

| <b>Proton</b>    | <b>Free-dGMP</b> | <b>Bound-dGMP</b> |
|------------------|------------------|-------------------|
| <b>H1</b>        | N.D.             | 11.36             |
| <b>H8</b>        | 8.14             | 7.97              |
| <b>H1'</b>       | 6.30             | 6.09              |
| <b>H2'</b>       | 2.49             | 2.49              |
| <b>H2''</b>      | 2.80             | 2.80              |
| <b>H3'</b>       | 4.70             | 4.70              |
| <b>H4'</b>       | 4.21             | 4.21              |
| <b>H5', H5''</b> | 3.95, 4.00       | 3.95, 4.00        |

**Table S3.** Proton chemical shifts of free-berberine and bound-berberine at 25 °C in pH 7, 50 mM K<sup>+</sup>-containing solution.

| <b>Proton</b> | <b>Free-berberine</b> | <b>Bound-berberine</b> |
|---------------|-----------------------|------------------------|
| <b>H51</b>    | 3.18                  | 2.70                   |
| <b>H52</b>    | 3.18                  | 2.78                   |
| <b>H61</b>    | 4.93                  | 4.62                   |
| <b>H62</b>    | 4.93                  | 4.57                   |
| <b>HA</b>     | 4.04                  | 3.75                   |
| <b>HB</b>     | 4.08                  | 3.85                   |
| <b>HC1</b>    | 6.06                  | 5.81                   |
| <b>HC2</b>    | 6.06                  | 5.85                   |
| <b>H1</b>     | 7.37                  | 6.71                   |
| <b>H4</b>     | 6.91                  | 6.10                   |
| <b>H8</b>     | 9.60                  | 9.01                   |
| <b>H11</b>    | 7.98                  | 7.47                   |
| <b>H12</b>    | 7.85                  | 7.24                   |
| <b>H13</b>    | 8.36                  | 7.85                   |

**Table S4.** Intermolecular NOEs between the Pu19m2 DNA and dGMP.

|             | <b>G11</b> | <b>G7</b> |
|-------------|------------|-----------|
| <b>dGMP</b> | <b>H8</b>  | <b>H1</b> |
| <b>H1</b>   |            | W         |
| <b>H8</b>   | W          | W         |
| <b>H1'</b>  | M          |           |
| <b>H2'</b>  | M          |           |
| <b>H2''</b> | S          |           |
| <b>H3'</b>  | W          |           |
| <b>H4'</b>  | W          |           |

Note: S = strong, M = Medium intensity, W = weak intensity, VW = very weak intensity.

**Table S5.** Intermolecular NOEs between the berberine and dGMP-Pu19m2 DNA.

**5'-end Berberine**

|     | G3 | G14 |    | A1 |    | A2 | G7 | dGMP |     |
|-----|----|-----|----|----|----|----|----|------|-----|
| BER | H1 | H1  | H8 | H8 | H2 | H2 | H8 | H8   | H1' |
| H8  | VW | W   |    |    |    |    |    |      |     |
| H4  | M  |     |    |    | M  |    |    |      |     |
| H51 |    | M   |    |    |    |    |    |      |     |
| H52 |    | M   |    |    |    |    |    |      |     |
| H61 | W  | M   |    |    |    | W  |    |      |     |
| H62 | VW | W   |    |    |    | M  |    |      |     |
| HA  |    |     | VW | M  |    |    |    |      |     |
| HB  |    |     |    |    |    |    |    | M    | W   |
| HC1 |    |     |    |    |    |    | W  |      |     |
| HC2 |    |     |    |    |    |    | M  |      |     |
| H11 |    |     |    |    |    |    |    | M    |     |
| H12 |    |     |    |    |    |    |    | W    |     |

**3'-end Berberine**

|     | G9 |    |     | G12 | G5 |    | G16 | A19 |    | A17 |
|-----|----|----|-----|-----|----|----|-----|-----|----|-----|
| BER | H1 | H8 | H1' | H1  | H1 | H8 | H1  | H2  | H8 | H2  |
| H8  | W  |    |     | M   | W  |    |     | W   |    | W   |
| H51 |    |    |     | M   |    |    |     |     |    |     |
| H52 |    |    |     |     |    |    |     |     | OL |     |
| H61 | W  |    |     | M   | W  |    | W   |     |    |     |
| H62 | M  |    |     | M   | W  |    | W   |     |    |     |
| HA  |    |    |     |     |    |    |     | W   |    |     |
| HB  |    | M  | W   |     |    |    |     | OL  |    |     |
| HC1 |    |    |     |     |    | M  |     |     |    |     |
| HC2 |    |    |     |     |    | M  |     |     |    |     |
| H11 |    |    |     |     |    |    |     | W   |    |     |
| H12 |    |    |     |     |    |    |     | W   |    |     |

Note: M = Medium intensity, W = weak intensity, VW = very weak intensity, OL = overlapped.

**Table S6.** Inter-residue NOEs of the 5'-end capping structure.

|             | <b>A2</b> |           |
|-------------|-----------|-----------|
| <b>A1</b>   | <b>H8</b> | <b>H2</b> |
| <b>H2</b>   |           | OL        |
| <b>H8</b>   | W         |           |
| <b>H1'</b>  | M         |           |
| <b>H2'</b>  | VW        |           |
| <b>H2''</b> | W         |           |
| <b>H3'</b>  | W         |           |
| <b>H4'</b>  | OL        |           |
| <b>H5'</b>  | VW        |           |
| <b>H5''</b> | VW        |           |

|             | <b>G3</b> |           | <b>G14</b> |
|-------------|-----------|-----------|------------|
| <b>A2</b>   | <b>H1</b> | <b>H8</b> | <b>H1</b>  |
| <b>H2</b>   | W         |           | W          |
| <b>H8</b>   |           |           | W          |
| <b>H1'</b>  |           | M         |            |
| <b>H2'</b>  |           | W         |            |
| <b>H2''</b> |           | M         |            |
| <b>H3'</b>  |           | W         |            |
| <b>H4'</b>  |           | M         |            |
| <b>H5'</b>  |           | VW        |            |
| <b>H5''</b> |           | VW        |            |

Note: M = Medium intensity, W = weak intensity, VW = very weak intensity, OL = overlapped.

**Table S7.** Inter-residue NOEs of the 3'-end capping structure.

|      | C18 |    |     |     |      | G16 |    |     |     |      | G12 |    |
|------|-----|----|-----|-----|------|-----|----|-----|-----|------|-----|----|
| A17  | H5  | H6 | H4' | H5' | H5'' | H1  | H8 | H1' | H2' | H2'' | H3' | H1 |
| H8   | W   | W  |     |     |      |     | W  | M   | M   | S    | M   |    |
| H2   |     |    |     |     |      | W   |    |     |     |      |     | W  |
| H1'  |     | W  | M   | M   | W    |     |    |     |     |      |     |    |
| H2'  |     | M  |     |     |      |     |    |     |     |      |     |    |
| H2'' |     | S  |     |     |      |     |    |     |     |      |     |    |
| H3'  |     | M  |     |     |      |     |    |     |     |      |     |    |
| H4'  |     | W  |     |     |      |     |    |     |     |      |     |    |
| H5'  |     |    |     |     |      |     |    | M   |     |      |     |    |
| H5'' |     |    |     |     |      |     |    | M   |     |      |     |    |

|      | A19 |     |      |
|------|-----|-----|------|
| C18  | H8  | H5' | H5'' |
| H1'  | M   | W   | W    |
| H2'  | W   |     |      |
| H2'' | M   |     |      |
| H3'  | M   |     |      |
| H4'  | W   |     |      |

Note: S = Strong intensity, M = Medium intensity, W = weak intensity, VW = very weak intensity.



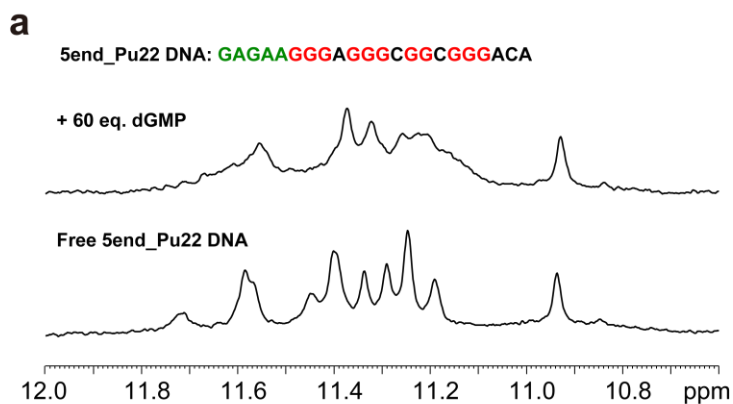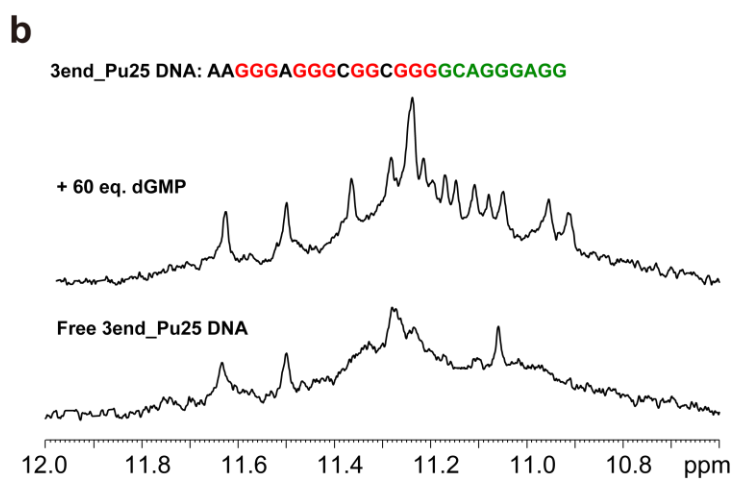

**Figure S1.** 1D  $^1\text{H}$  NMR spectra of 5end\_Pu22 (a) and 3end\_Pu25 (b) DNA in the absence and presence 60 eq. dGMP. DNA sequences are shown at top. Conditions: 150  $\mu\text{M}$  DNA, pH 7, 50 mM  $\text{K}^+$  solutions, 25  $^\circ\text{C}$ .

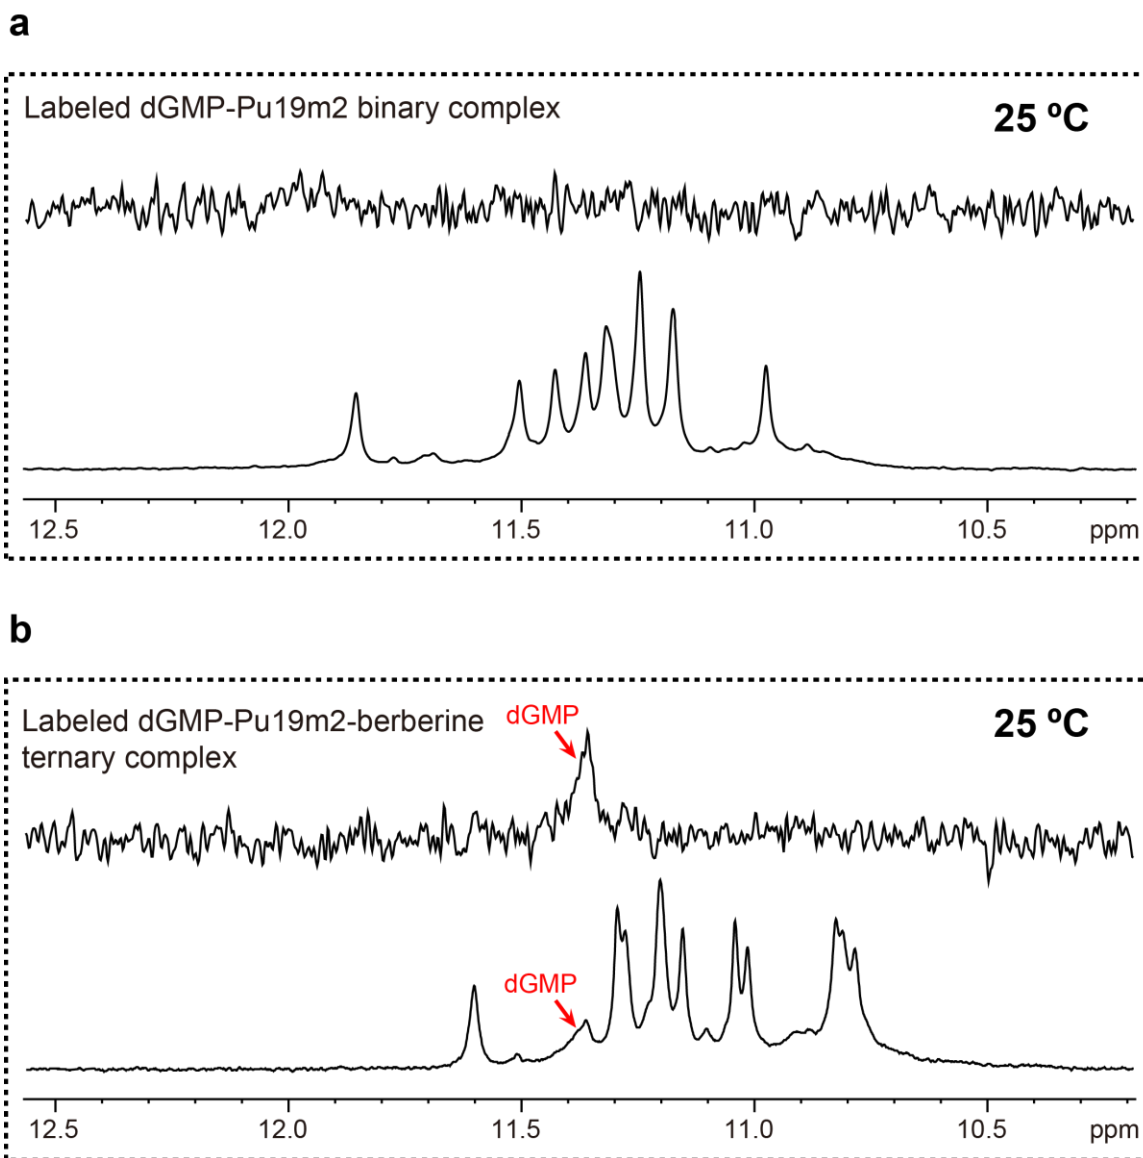

**Figure S2.** dGMP H1 proton assignments of dGMP-vG4 binary complex (a) and berberine-dGMP-vG4 ternary complex (b) by 1D  $^{15}\text{N}$ -edited experiments using  $^{13}\text{C}$ - $^{15}\text{N}$ -labeled dGMP. The upper spectrum corresponds to the  $^{15}\text{N}$ -edited experiments, whereas the lower spectrum is  $^1\text{H}$  1D experiment of the same sample. Conditions: 150  $\mu\text{M}$  Pu19m2 DNA, 15:1 labeled dGMP:Pu19m2, 2:1 drug:DNA, pH 7, 50 mM  $\text{K}^+$  solution, 25 °C.

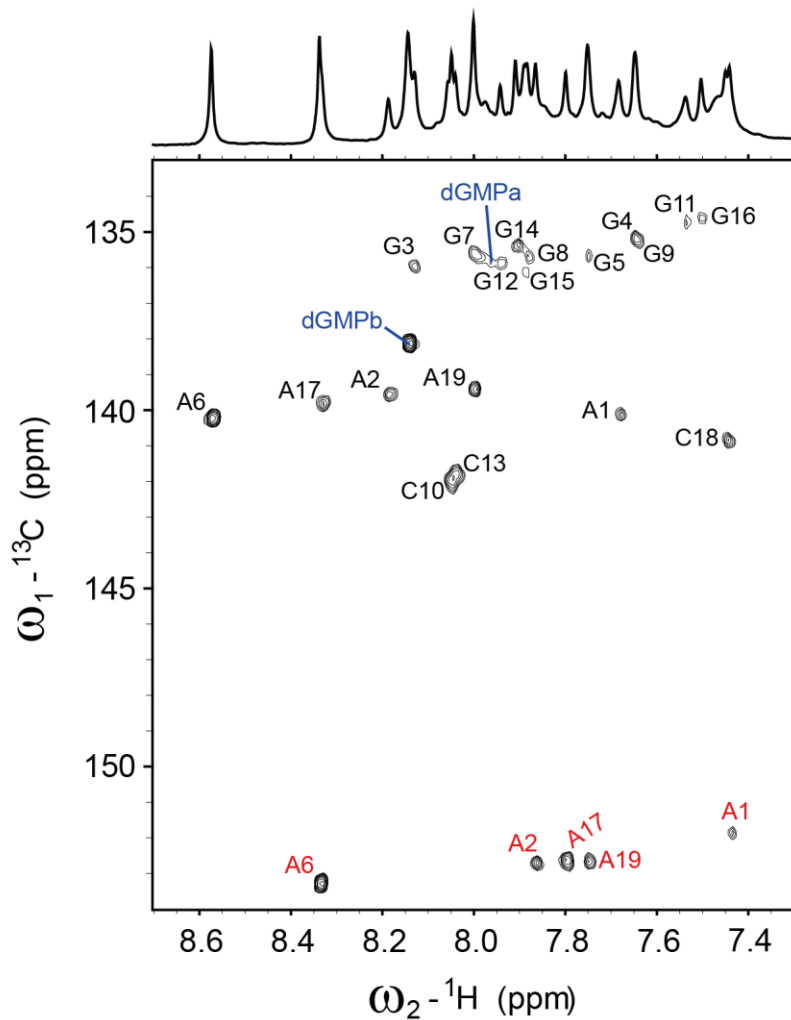

**Figure S3.** H6–C6/H8–C8 cross-peaks for all bases (black label) and the adenine H2-C2 contacts (red label) assignments for berberine-dGMP-vG4 ternary complex by HSQC experiments. The H8–C8 cross-peaks of free-dGMP (dGMPb) and bound-dGMP (dGMPa) are labeled in blue. Conditions: 1.5 mM Pu19m2 DNA, 3:1 dGMP:DNA, 2:1 drug:DNA, pH 7, 25 °C, 50 mM K<sup>+</sup> solution.

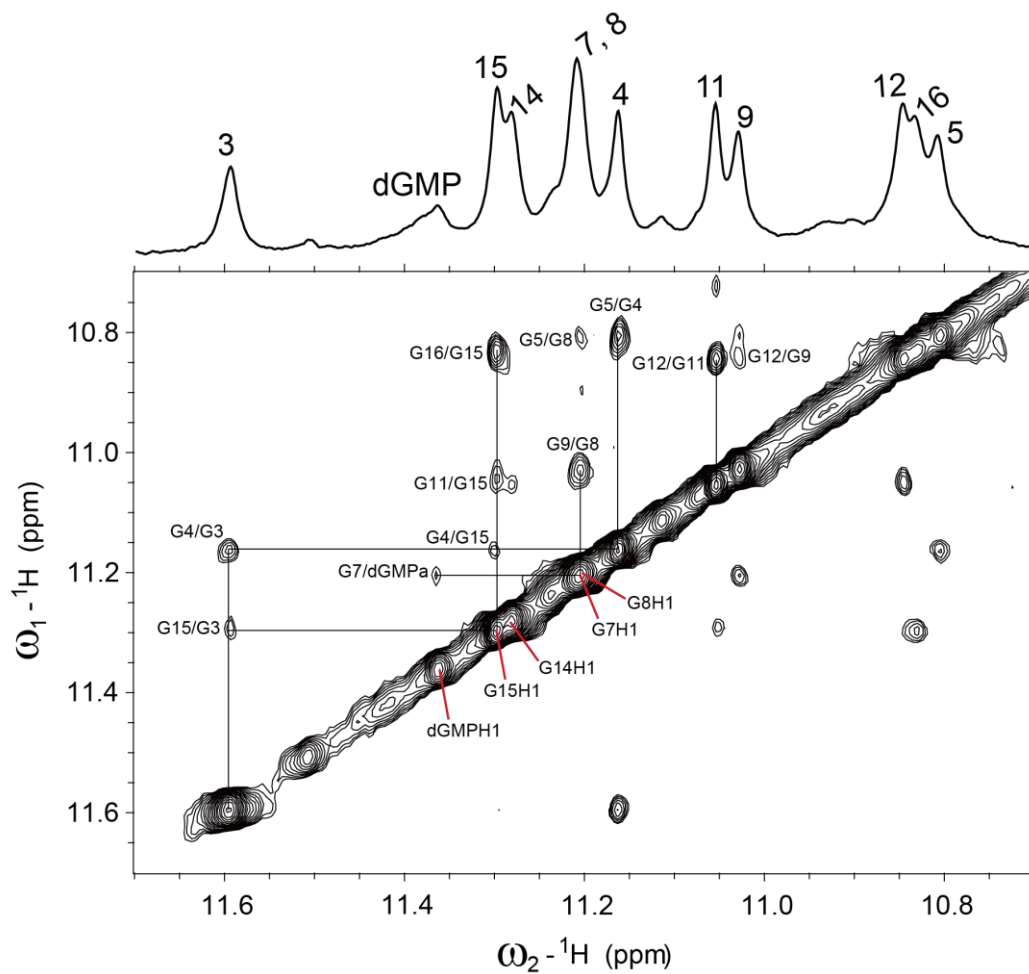

**Figure S4.** The H1–H1 region of the 2D-NOESY spectrum of berberine-dGMP-vG4 ternary complex in H<sub>2</sub>O with sequential assignment pathway. Conditions: 1.5 mM Pu19m2 DNA, 3:1 dGMP:DNA, 2:1 drug:DNA, pH 7, 25 °C, 50 mM K<sup>+</sup> solution, mixing time of 300 ms.

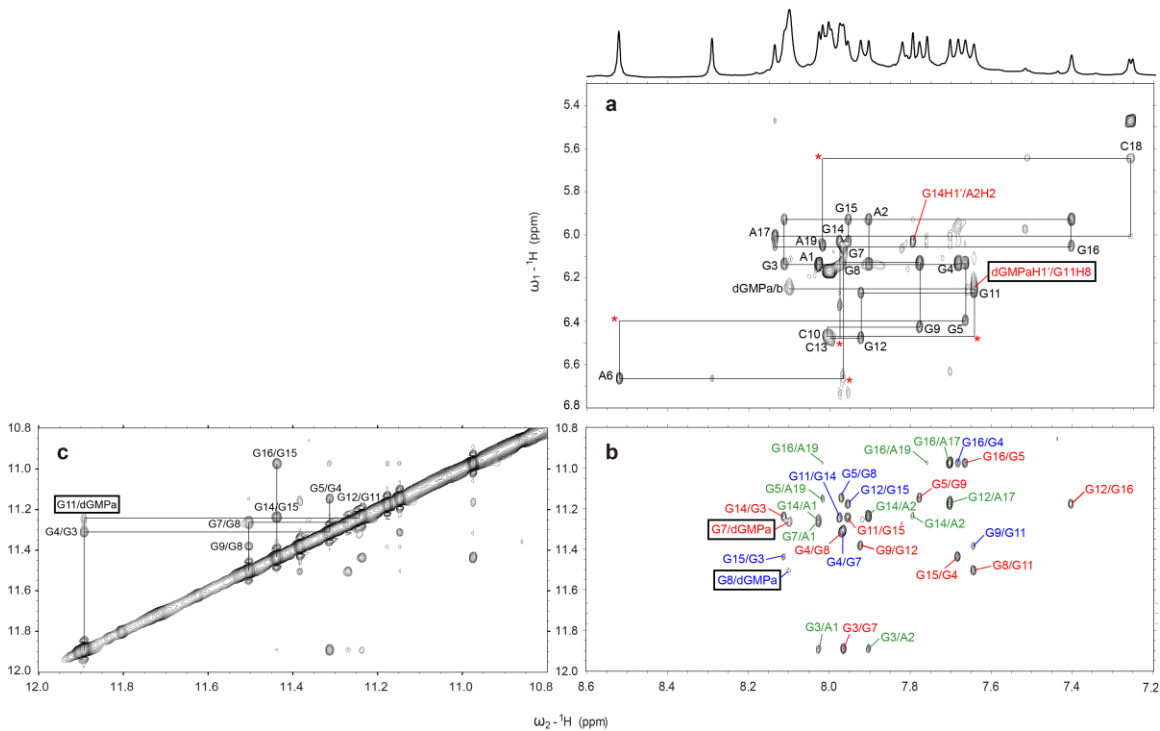

**Figure S5.** (a) The H1'-H8 region, (b) H8-H1 region, and (c) H1-H1 region of the 2D-NOESY spectrum of dGMP-vG4 binary complex in H<sub>2</sub>O with sequential assignment pathway. The NOE cross-peaks that involved in bound-dGMP (dGMPa) are marked by black boxes. Conditions: 2.8 mM Pu19m2 DNA, 3:1 dGMP:DNA, pH 7, 15 °C, 50 mM K<sup>+</sup> solution, mixing time of 250 ms.

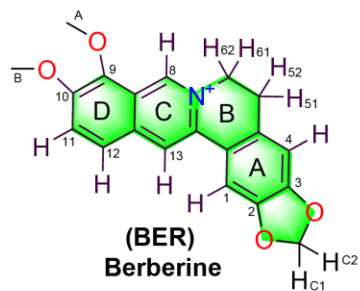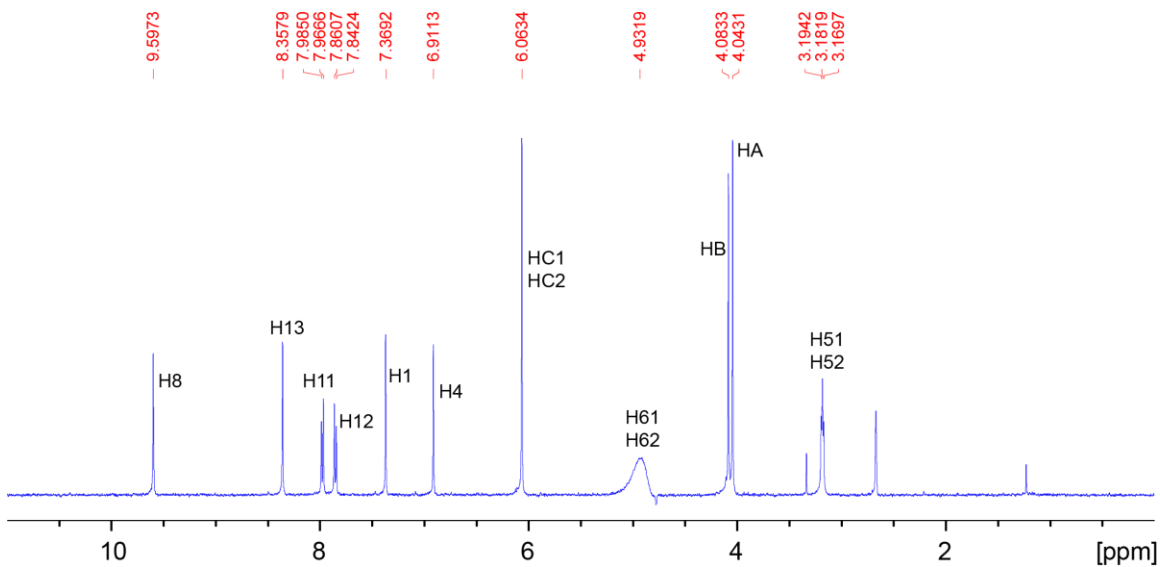

**Figure S6.** 1D  $^1\text{H}$  NMR spectrum of the free berberine in pH 7, 50 mM  $\text{K}^+$  at 25 °C with peak assignments and corresponding chemical structure.

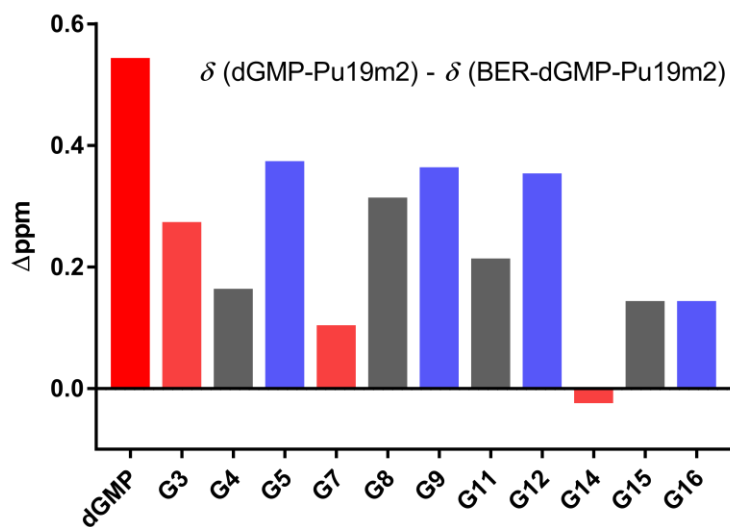

**Figure S7.** The H1 proton chemical shift difference between the dGMP-Pu19m2 G4 and its berberine ternary complex at 25 °C. The residue numbers of dGMP-Pu19m2 G4 are shown. 5'-end, mid-, and 3'-end G-tetrad guanines are colored in red, gray, and blue, respectively.

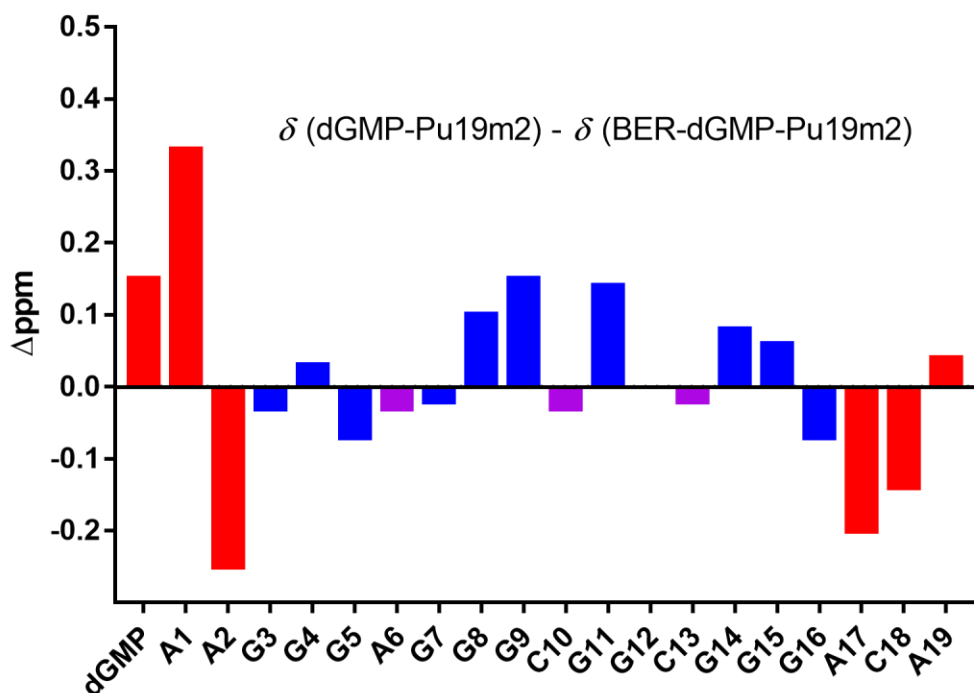

**Figure S8.** The H8/H6 proton chemical shift difference between the dGMP-Pu19m2 G4 and its berberine ternary complex at 25 °C. The residue numbers of dGMP-Pu19m2 G4 are shown. dGMP and flanking bases, G-tetrad guanines, and loop bases are colored in red, blue, and purple, respectively.



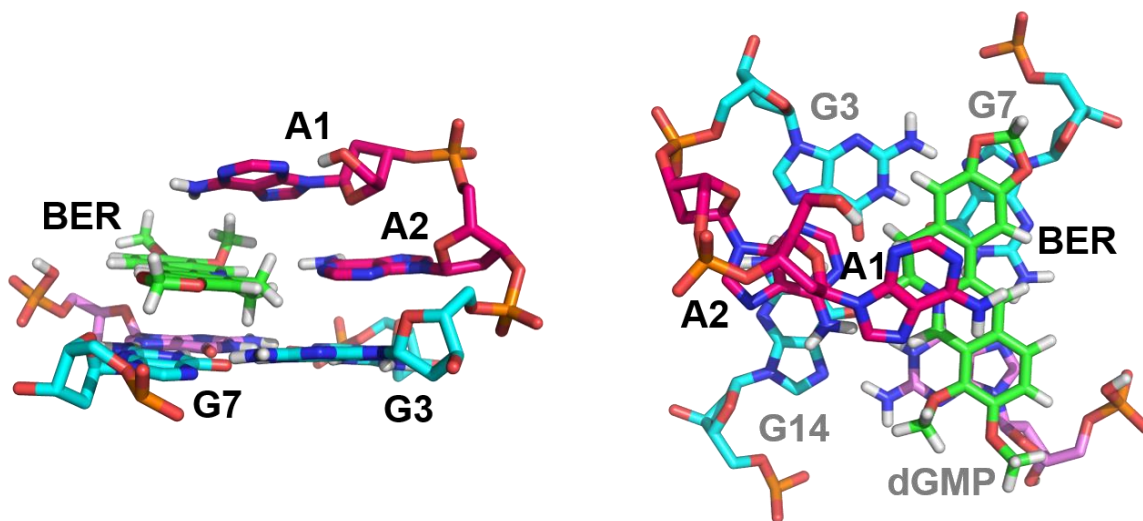

**Figure S9.** Side (left) and top (right) view of the 5'-end capping structure.

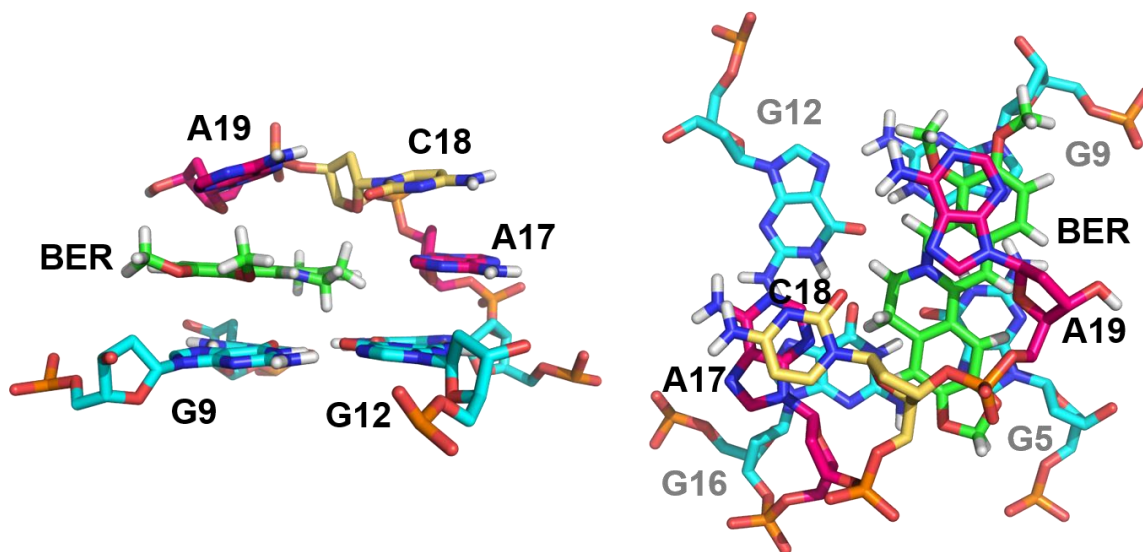

**Figure S10.** Side (left) and top (right) view of the 3'-end capping structure.

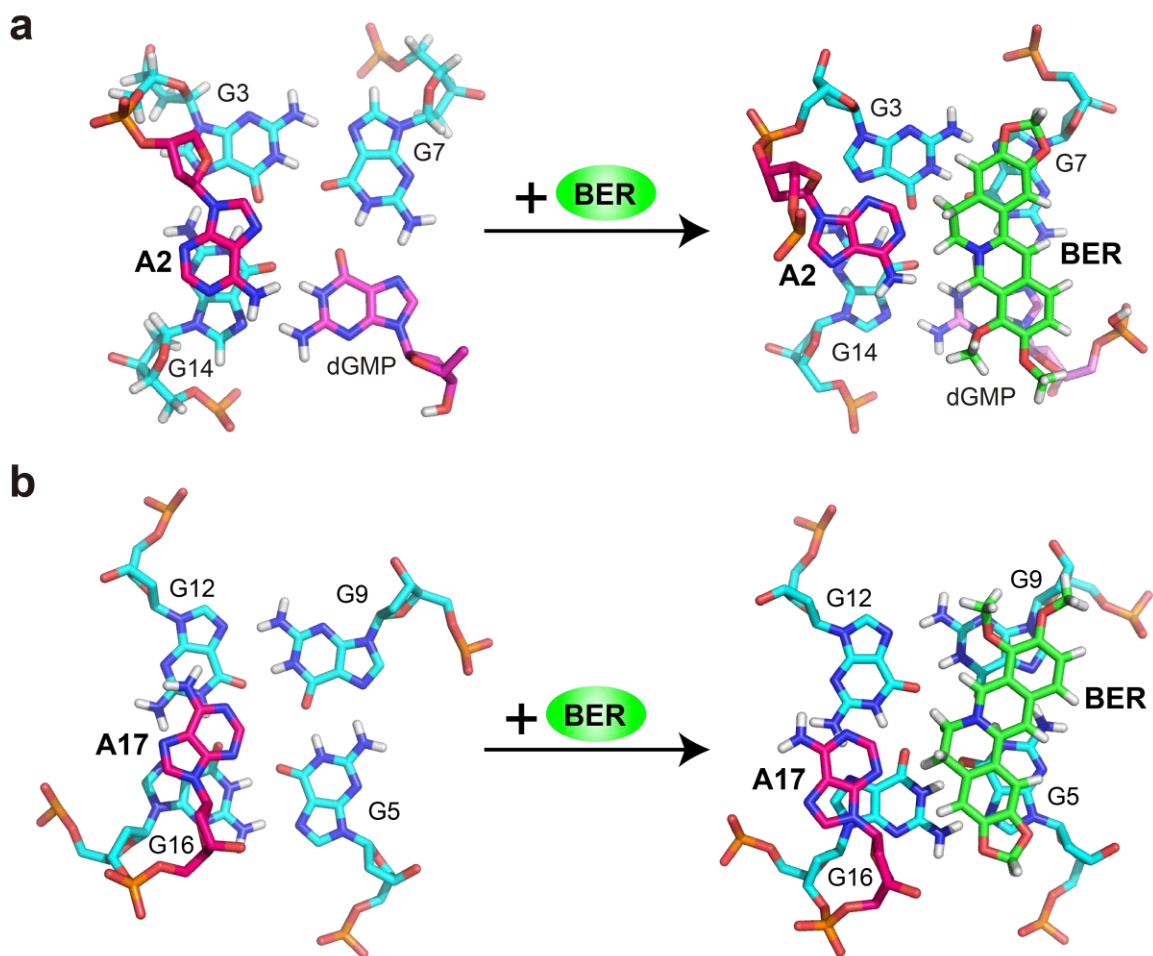

**Figure S11.** (a) 5'-end and (b) 3'-end top views of the berberine:A2 and berberine:A17 “quasi-triad” planes formation process.
